# Supplementary material for: Mesoporous transition metal dichalcogenide ME2 (M = Mo, W; E = S, Se) with 2-D layered crystallinity as anode materials for lithium ion batteries
Source: Royal Society of Chemistry journal article supplement (doi:10.1039/c5ra19799f), 2016-01-01
Supplement: c5ra19799f1.pdf [file c5ra19799f1.pdf]

Electronic Supplementary Information (ESI) for RSC Advances

This journal is © Royal Society of Chemistry 2016

**Mesoporous transition metal dichalcogenide ME<sub>2</sub> (M = Mo, W; E = S, Se)  
with 2-D layered crystallinity as anode materials for lithium ion batteries**

Yoon Yun Lee,<sup>a</sup> Gwi Ok Park,<sup>b</sup> Yun Seok Choi,<sup>c</sup> Jeong Kuk Shon,<sup>‡c</sup> Jeongbae Yoon,<sup>b</sup> Kyoung Ho Kim,<sup>c</sup> Won-Sub Yoon,<sup>\*b</sup> Hansu Kim,<sup>\*d</sup> and Ji Man Kim<sup>\*abc</sup>

<sup>a</sup> SKKU Advanced Institute of Nanotechnology (SAINT), Sungkyunkwan University, Suwon 16419, Republic of Korea

<sup>b</sup> Department of Energy Science, Sungkyunkwan University, Suwon 16419, Republic of Korea

<sup>c</sup> Department of Chemistry, Sungkyunkwan University, Suwon 16419, Republic of Korea

<sup>d</sup> Department of Energy Engineering, Hanyang University, Seoul 04763, Republic of Korea

\*Corresponding authors: Prof. Won-Sub. Yoon (wsyoon@skku.edu); Prof. Hansu Kim (khansu@hanyang.ac.kr); Prof. Ji Man Kim (jimankim@skku.edu)

‡ Present address: Energy Lab., Samsung Advanced Institute of Technology (SAIT), Samsung Electronics Co., Ltd., P.O. Box 111, Suwon 16678, Republic of Korea

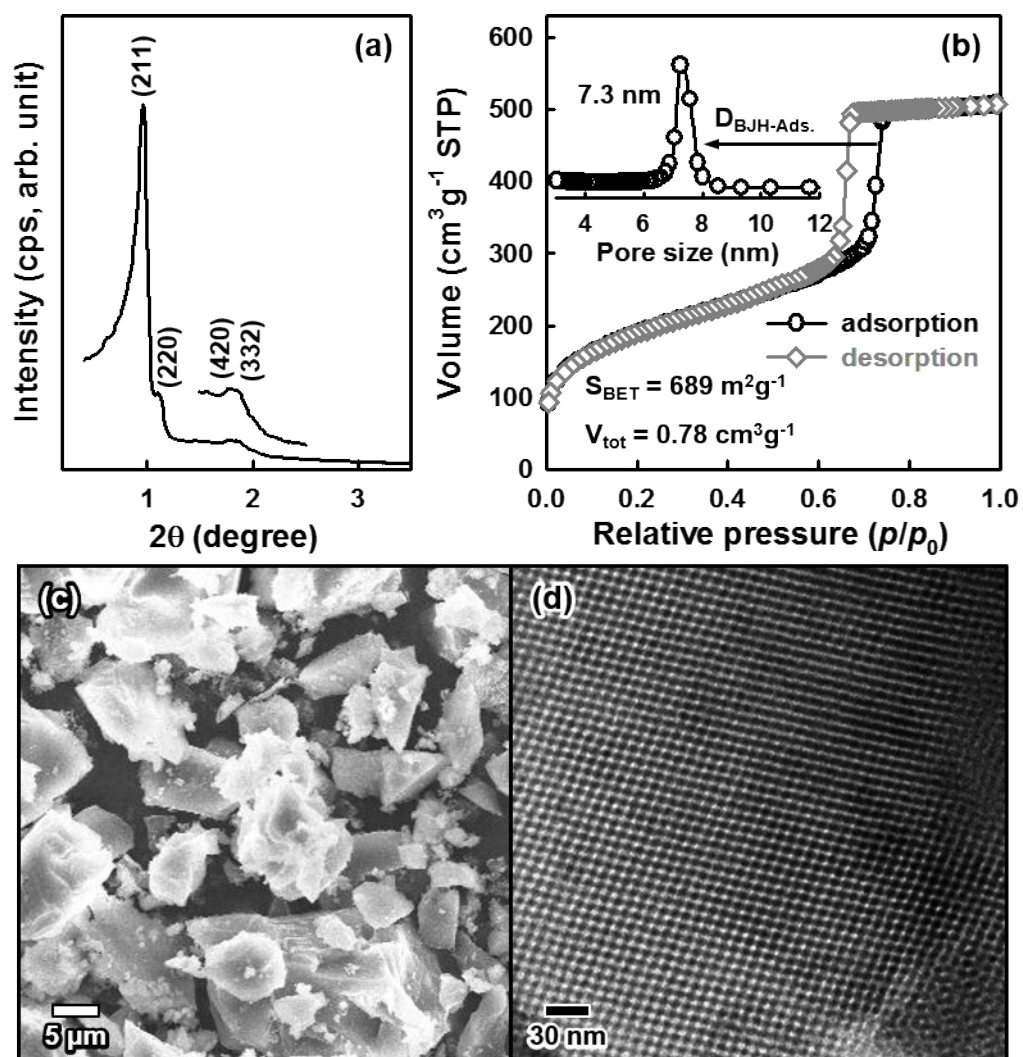

**Figure S1.** (a) Low angle XRD pattern, (b)  $\text{N}_2$ -sorption isotherm and pore size distribution curve, (c) SEM image and (d) TEM image of the mesoporous silica KIT-6.

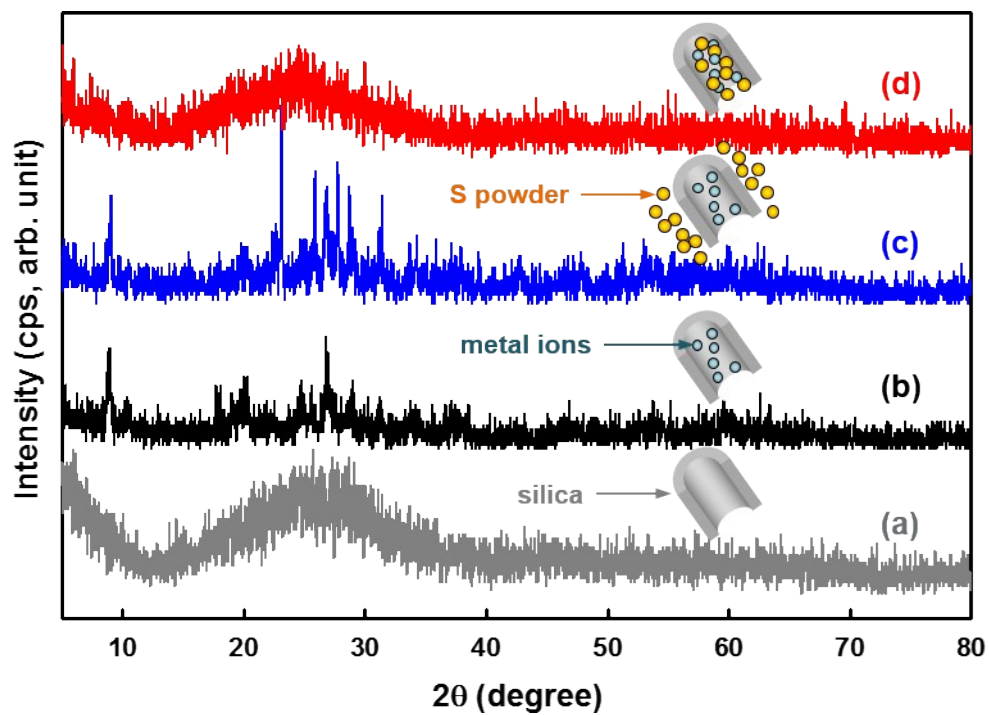

**Figure S2.** Wide angle XRD patterns of (a) KIT-6 silica template, (b)  $\text{H}_3\text{PMo}_{12}\text{O}_{40} \cdot x\text{H}_2\text{O}@\text{KIT-6}$  silica template, (c) mixture of  $\text{H}_3\text{PMo}_{12}\text{O}_{40} \cdot x\text{H}_2\text{O}@\text{KIT-6}$  and sulphur powder, and (d) after heating at 160 °C for 12 h of (c).

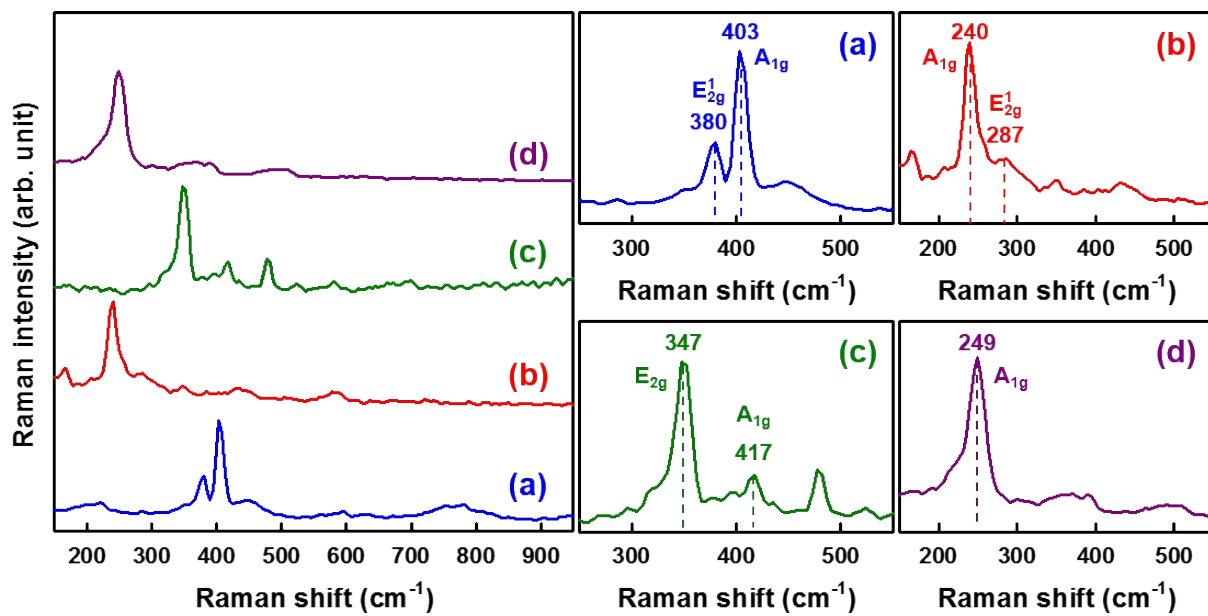

**Figure S3.** Raman spectrums of the mesoporous (a) MoS<sub>2</sub>, (b) MoSe<sub>2</sub>, (c) WS<sub>2</sub> and (d) WSe<sub>2</sub>.

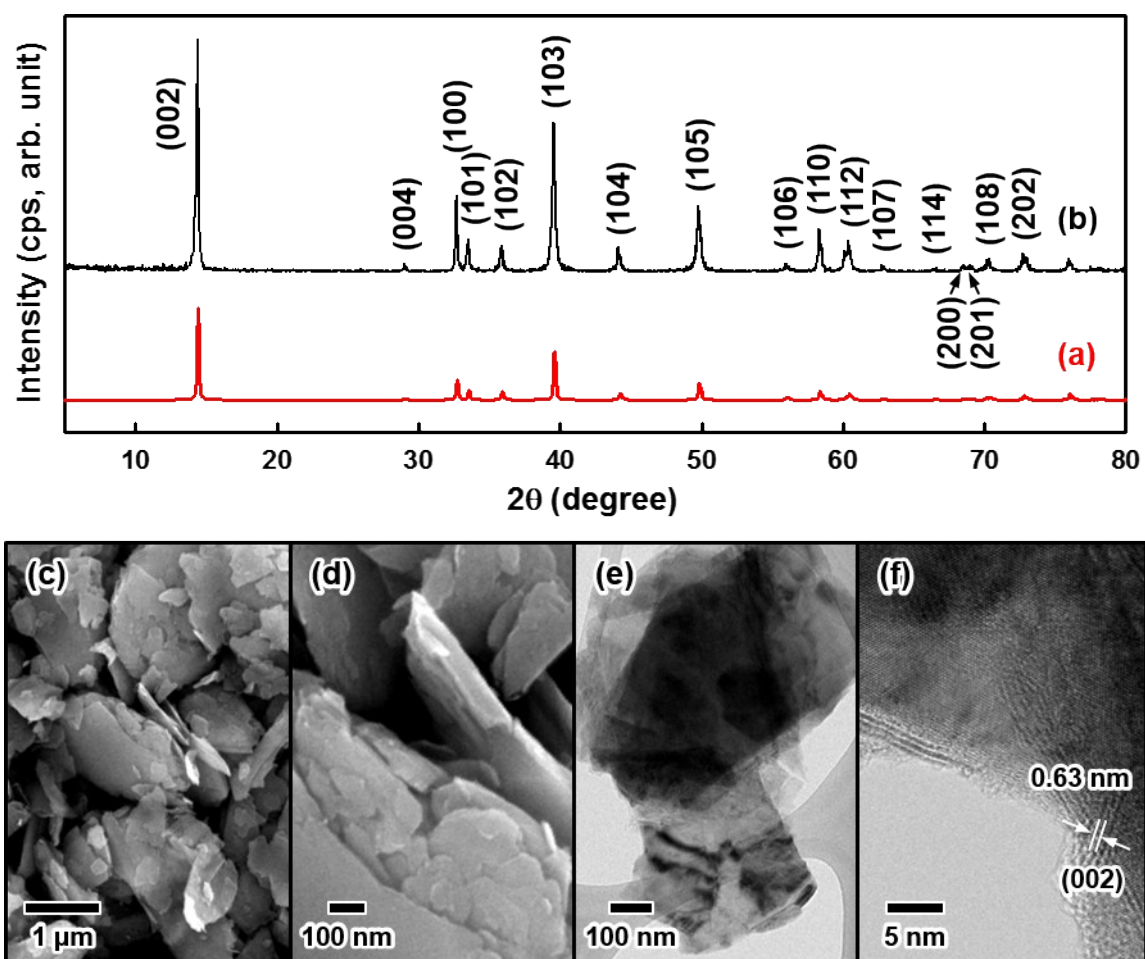

**Figure S4.** Wide angle XRD patterns of (a) MoS<sub>2</sub> in JCPDS #87-2416, (b) bulk MoS<sub>2</sub>, (c, d) SEM images and (e, f) TEM images of the bulk MoS<sub>2</sub>.

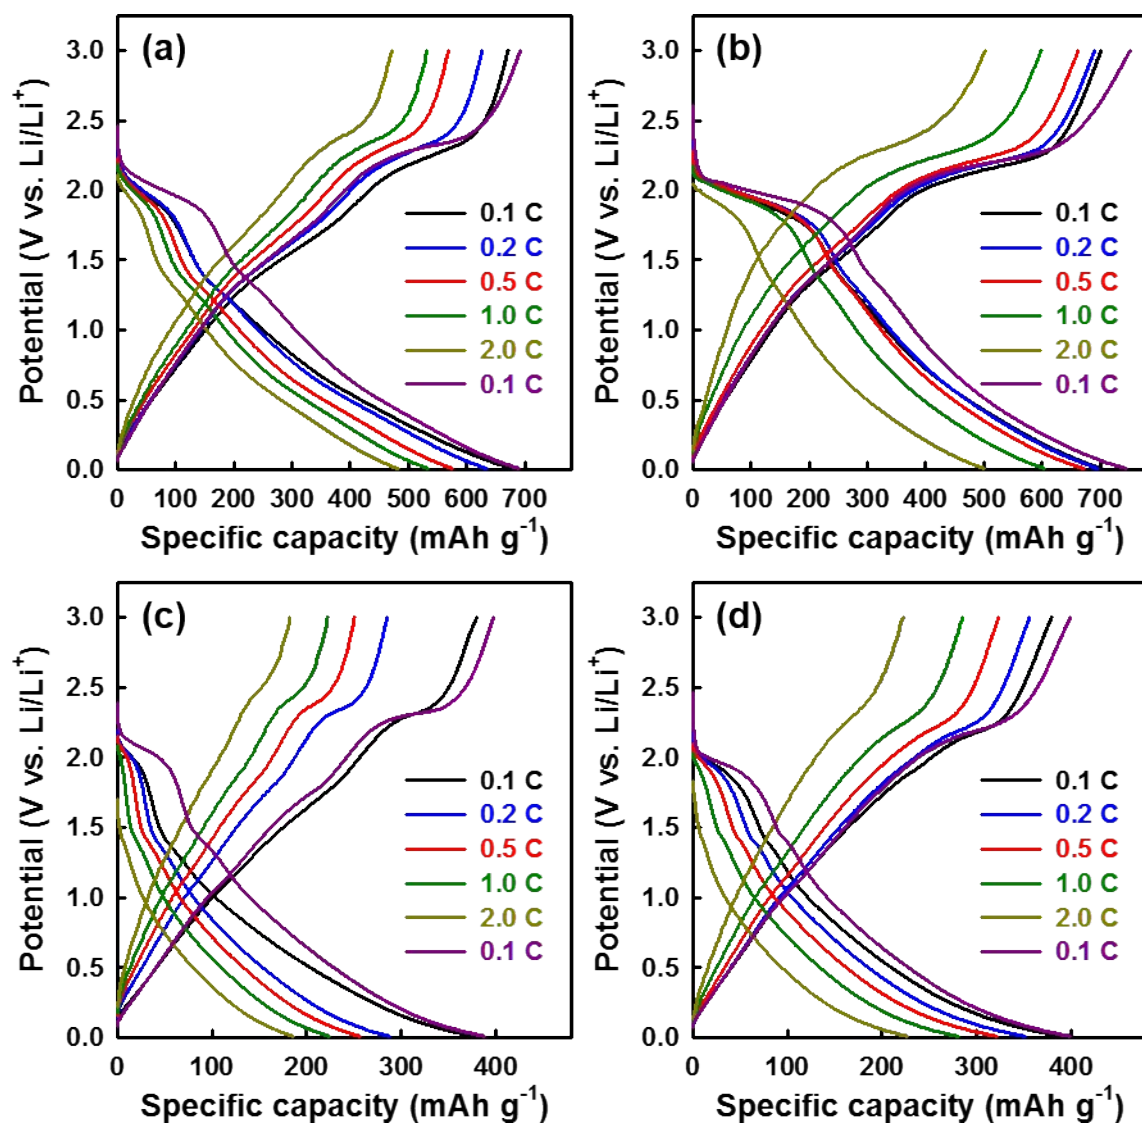

**Figure S5.** Galvanostatic discharge – charge curves at various current rates from 0.1 to 2 C of the mesoporous electrodes, (a)  $\text{MoS}_2$ , (b)  $\text{MoSe}_2$ , (c)  $\text{WS}_2$  and (d)  $\text{WSe}_2$ .
